# Supplementary material for: Monitoring of volatile organic compounds using a single tin dioxide sensor
Source: Royal Society of Chemistry journal article supplement (doi:10.1039/c2em30224a), 2012-01-01
Supplement: c2em30224a.pdf [file c2em30224a.pdf]

† **Electronic Supplementary Information (ESI) available:  
 Supplementary measuring chart and references hyperlinks**

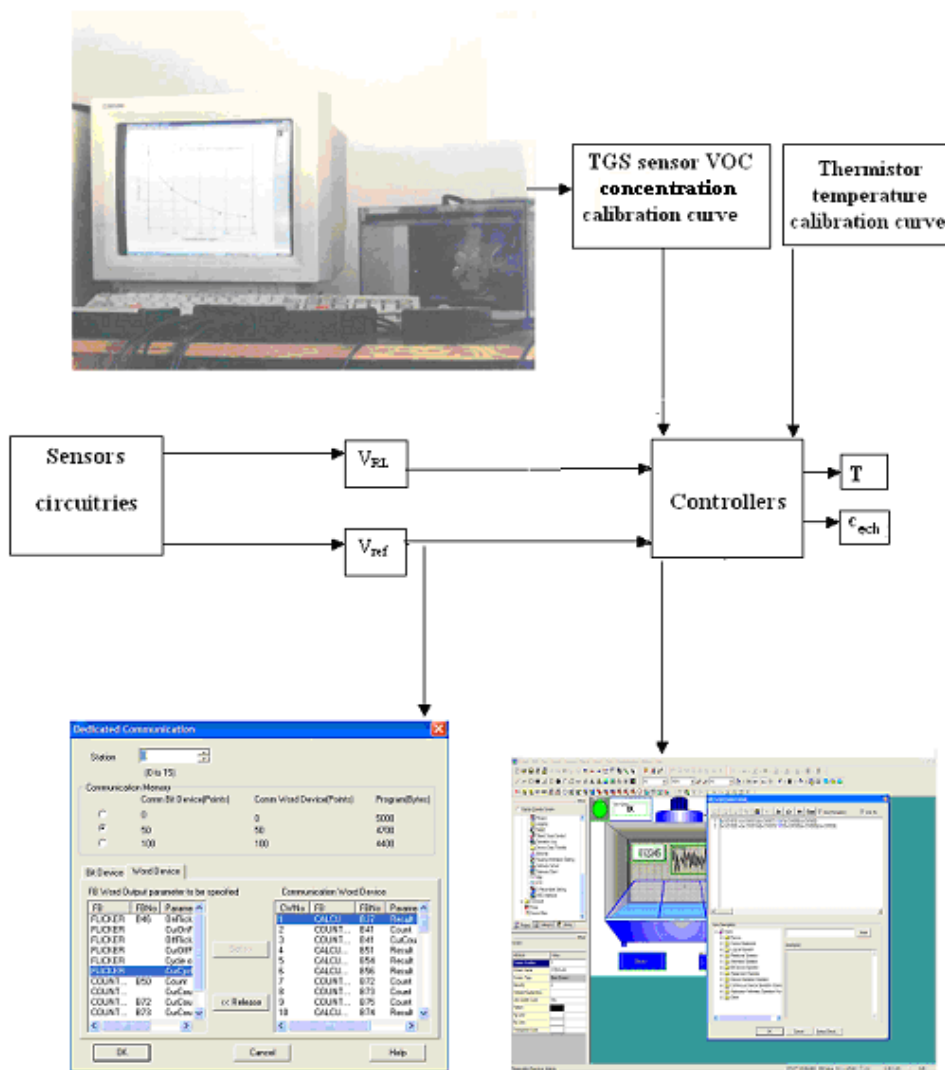

**The measuring of the equivalent concentration of VOCs implies:**

- Measuring the calibration curve, for the specific mixture of VOCs and TGS sensor, using the Figaro calibration chamber SR3
- Using the specific software, included in the PLC, whose input data are:
  - Output signal from the VOC sensor circuit ( $V_{RL}$ )
  - Output signal from the temperature sensor circuit ( $V_{ref}$ )

and the embedded data:

- Calibration curve for the tin dioxide sensor – normalized curve of its electrical resistance  $R_S$  to the pure air one  $R_0$
- Thermistor resistance function of temperature
- Defined limit for VOCs concentration, in order to set the alarm

## References hyperlinks

- 1 M. McGinness, *Proc. 25th Ind. En. Tech. Conf.*, Houston, TX, 2003, 59-68  
<http://repository.tamu.edu/handle/1969.1/91015>
- 2 T. Poncet, *World Leather*, 2006, 19 (3), 16-19  
[http://www.aaqtc.org.ar/congresos/istanbul2006/Visual Displays/V 33 - Volatile organic carbons -VOCs- in the tanning industries.pdf](http://www.aaqtc.org.ar/congresos/istanbul2006/Visual%20Displays/V%2033%20-%20Volatile%20organic%20carbons%20-%20VOCs%20-%20in%20the%20tanning%20industries.pdf)
- 3 S. Ojala, U. Lassi and R. L. Keiski, *Chemosphere*, 2006, 62, 113-120  
<http://www.ncbi.nlm.nih.gov/pubmed/15893795>
- 4 K. Solbu, M. Hersson, S. Thorud, E. Lundanes, T. Nilsen, O. Synnes, D. Ellingsen and P. Molander, *J. Environ. Monit.*, 2010, 12, 1195-1202  
[http://www.researchgate.net/publication/51050013\\_Compact\\_semi-automatic\\_incident\\_sampler\\_for\\_personal\\_monitoring\\_of\\_volatile\\_organic\\_compounds\\_in\\_occupational\\_air](http://www.researchgate.net/publication/51050013_Compact_semi-automatic_incident_sampler_for_personal_monitoring_of_volatile_organic_compounds_in_occupational_air)
- 5 R. G. Derwent, *Volatile organic compounds in the atmosphere* Eds.: R. E. Hester and R. M. Harrison, RSC, 1995, 1-6  
[http://books.google.ro/books?id=uN3xtF6vmAcC&pg=PA1&lpg=PA1&dq=RICHARD+G.+DERWENT+VOC&source=bl&ots=orpSduVkUK&sig=ZT8cFndROPeXITk7kknqPWugig&hl=ro&ei=9QplTaLAGtLAtgfp42WBg&sa=X&oi=book\\_result&ct=result&resnum=1&ved=0CBYQ6AEwAA" \l](http://books.google.ro/books?id=uN3xtF6vmAcC&pg=PA1&lpg=PA1&dq=RICHARD+G.+DERWENT+VOC&source=bl&ots=orpSduVkUK&sig=ZT8cFndROPeXITk7kknqPWugig&hl=ro&ei=9QplTaLAGtLAtgfp42WBg&sa=X&oi=book_result&ct=result&resnum=1&ved=0CBYQ6AEwAA)  
["v=onepage&q=RICHA](http://books.google.ro/books?id=uN3xtF6vmAcC&pg=PA1&lpg=PA1&dq=RICHARD+G.+DERWENT+VOC&source=bl&ots=orpSduVkUK&sig=ZT8cFndROPeXITk7kknqPWugig&hl=ro&ei=9QplTaLAGtLAtgfp42WBg&sa=X&oi=book_result&ct=result&resnum=1&ved=0CBYQ6AEwAA)
- 6 EPA APTI Course SI:417, *Controlling VOC emissions from leaking process equipment*, EPA 450/2-82-015 August 1982  
<http://nepis.epa.gov/Exe/ZyPURL.cgi?Dockey=2000K763.txt>
- 7 Directive 2004/42/CE on the limitation of emissions of volatile organic compounds due to the use of organic solvents in certain activities and installations, *Official journal*, 30.4.2004 <http://eur-lex.europa.eu/LexUriServ/LexUriServ.do?uri=OJ:L:2004:143:0087:0096:EN:pdf>
- 8 On-line Figaro Catalogue – <http://www.figarosensor.com>
- 9 H. Lahlou, J.-B. Sanchez, X. Vilanova, F. Berger, X. Correig, V. Fierro, A. Celzard, *Sensor Actuat B-Chem*, 2011, **156**, 680-688.  
<http://www.sciencedirect.com/science/article/pii/S0925400511001298>

- 10 W. Gopel and K. D. Schierbaum, *Sens. Actuators B*, 1995, 26 (1-3), 1-12  
<http://www.sciencedirect.com/science/article/pii/092540059401546T>
- 11 E. Llobet, R. Ionescu, S. Al-Khalifa, J. Brezmes, X. Vilanova ; X. Correig, N. Barsan and J.W. Gardner, *Sensors Journal, IEEE*, 2001, 1, 207-213  
[http://ieeexplore.ieee.org/xpl/login.jsp?tp=&arnumber=954833&url=http%3A%2F%2Fieeexplore.ieee.org%2Fxppls%2Fabs\\_all.jsp%3Farnumber%3D954833](http://ieeexplore.ieee.org/xpl/login.jsp?tp=&arnumber=954833&url=http%3A%2F%2Fieeexplore.ieee.org%2Fxppls%2Fabs_all.jsp%3Farnumber%3D954833)
- 12 F. Caldararu, M. Caldararu, A. Jeleu and A. Iacob, *Proc. Int. Geoscience and Remote Sensing Symposium*, Pasadena, 1994, 13-15  
[http://ieeexplore.ieee.org/xpl/freeabs\\_all.jsp?arnumber=399036](http://ieeexplore.ieee.org/xpl/freeabs_all.jsp?arnumber=399036)
- 13 M. Caldararu, A. Vasile and F. Caldararu, *International Symposium for design and technology of electronic packages SIITME*, Iasi, 2006  
<http://telecom.etc.tuiasi.ro/siitme2006/program1.pdf>
- 14 A. Szczurek, M. Maciejewska, B. Flisowska-Wiercik, and L. Bodzój, *J. Environ. Monit.*, 2009, 11, 1942-1951  
<http://pubs.rsc.org/en/content/articlelanding/2009/em/b907820g>
- 15 H. Teterycz, P. Halek, K. Wiśniewski, G. Halek, T. Koźlecki and I. Polowczyk, *Sensors*, 2011, 11, 4425-4437. <http://www.mdpi.com/1424-8220/11/4/4425>
- 16 M.A. Craven, J.W. Gardner, P.N. Bartlett, *Trend Anal. Chem.*, 1996, 15, 486-493.  
<http://www.sciencedirect.com/science/article/pii/S0165993696000611>
- 17 W. Bourgeois, A. C. Romain, J. Nicolas and M. Stuetz, *J. Environ. Monit.*, 2003, 5, 852-860. <http://pubs.rsc.org/en/content/articlelanding/2003/em/b307905h>
- 18 S. Capone, P. Siciliano, N. Barsan, U. Weimar, L. Vasanelli, *Sens. Actuators B-Chem*, 2001, 78, 40-48.  
<http://www.sciencedirect.com/science/article/pii/S0925400501007894>
- 19 E. Llobet, J. Brezmes, X. Vilanova, J. S. Sueiras and X. Correig, *Sensors and Actuators B: Chemical*, 1997, 41, 13-21.  
<http://www.sciencedirect.com/science/article/pii/S0925400597802729>
- 20 S. M. Hosseini-Golgoob and F. Hossein-Babaei, *Meas. Sci. Technol.*, 2011, 22, 1-11. <http://iopscience.iop.org/0957-0233/22/3/035201>

- 21 X. Vilanova, E. Llobet, R. Alcubilla, J.E. Sueiras and X. Correig *Sensors and Actuators B: Chemical.*, 1996, 175–180.  
<http://www.sciencedirect.com/science/article/pii/0925400596800633>
- 22 J.-B. Sanchez, F. Berger, M. Fromm, M.-H. Nadal, *Sensor Actuat B-Chem*, 2006, **119**, 227–233.  
<http://www.sciencedirect.com/science/article/pii/S0925400505009767>
- 23 X.Vilanova, E. Llobet, J. Brezmeck, J. Calderer and X. Correig *Sensors and Actuators B: Chemical.*, 1998, **48**, 425-431.  
<http://www.sciencedirect.com/science/article/pii/S092540059800080X>
- 24 J.-B. Sanchez, A. Schmitt, F. Berger and C. Mavon, *Journal of Sensors*, 2010, Article ID 409687, doi:10.1155/2010/409687.  
<http://www.hindawi.com/journals/js/2010/409687/>
- 25 N.D. Hoa, and S. A El-Safty, *Nanotechnology*, 2011, **22**, 485503, doi:10.1088/0957-4484/22/48/485503. <http://iopscience.iop.org/0957-4484/22/48/485503>
- 26 P. Sun, W. Zhao, Y. Cao, Y. Guan, Y. Sun and G. Lu, *CrystEngComm*, 2011, **13**, 3718-3724. <http://pubs.rsc.org/en/Content/ArticleLanding/2011/CE/C1CE05073G>
- 27 On-line Mitsubishi Controllers Catalogue 2012 - <https://my.mitsubishi-automation.com>.
- 28 M. Bätzill and U. Diebold, *Physical Chemistry Chemical Physics* 2007, **9**, 2307-2318.  
[http://www.surface.tulane.edu/pdf/PCCP\\_GasSensingReview\\_Feb07\\_final.pdf](http://www.surface.tulane.edu/pdf/PCCP_GasSensingReview_Feb07_final.pdf)
- 29 H. Teterycz, P. Halek, K. Wiśniewski, G. Halek, T. Koźlecki and I. Polowczyk, *Sensors* 2011, **11**, 4425-4437. <http://www.mdpi.com/1424-8220/11/4/4425>
- 30 J. S. Steinhart and S. R. Hart, *Deep Sea Research and Oceanographic Abstracts*, 1968, **15**, 497-503.  
<http://www.sciencedirect.com/science/article/pii/0011747168900570>
- 31 Betatherm Sensors - <http://ro.farnell.com/betatherm>
- 32 O. Niculescu, M. Leca, *Rev. Chim.*, 2007, 58, 276 –282.  
[http://www.revistadechimie.ro/pdf/3\\_2007\\_6.pdf](http://www.revistadechimie.ro/pdf/3_2007_6.pdf)

- 33 J. Lin, B. Ding , J. Yang , J. Yu and G. Sun, *Nanoscale*, 2012, **4**, 176-182.  
<http://pubs.rsc.org/en/Content/ArticleLanding/2012/NR/c1nr10895f>
- 34 ECO SIMPLEX NOVA - <http://www.ecosimplexnova.ro>
